# Supplementary material
Source: PubMed Central journal article supplement (PMC6280652)
Supplement: EMBR-19-e46065-s002.pdf [file EMBR-19-e46065-s002.pdf]

## Expanded View Figures

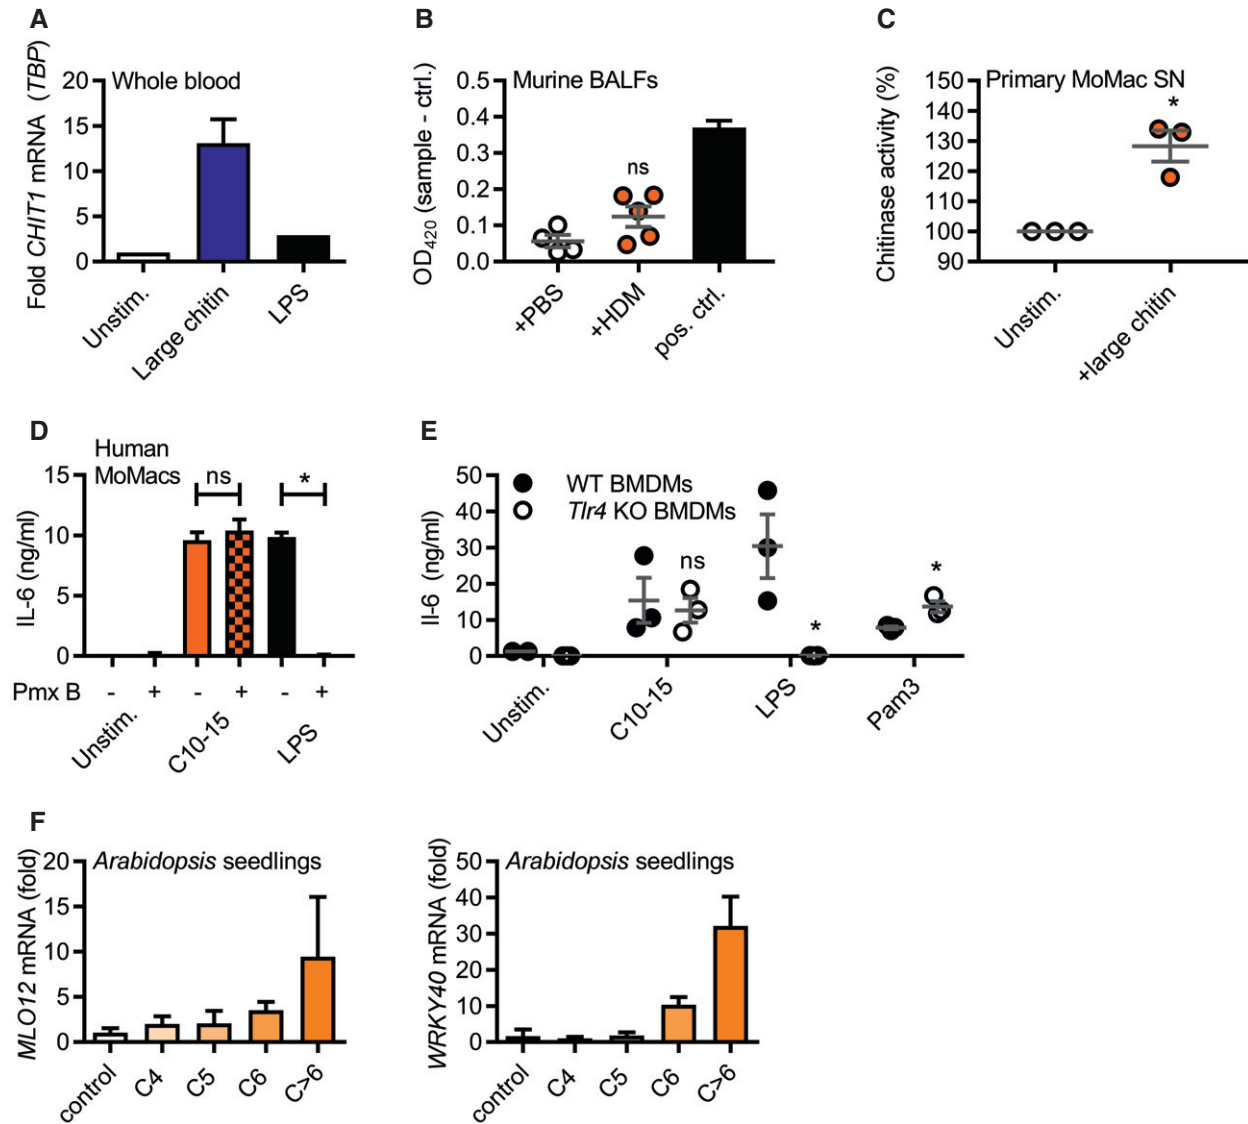

**Figure EV1. Chitin treatment results in chitinase and target gene induction in mammalian and plant cells, respectively.**

- A mRNA induction of *CHIT1* relative to *TBP* and unstimulated conditions in human whole blood treated with large chitin ( $n = 2$ ).
- B Chitin azure degradation indicative of chitinase activity in murine BALF from mice previously treated with PBS or house-dust mite allergen (HDM) *in vivo* ( $n = 5$ ). *S. griseus* recombinant chitinase was used as a positive control.
- C Primary human MoMacs were stimulated with C10-15 or large chitin for 24 h and supernatants harvested and incubated with chitin azure ( $n = 3$ ).
- D, E Cytokine release induced by chitin is independent of endotoxin. (D) IL-6 release from stimulated human MoMacs stimulated in the absence or presence of polymyxin B (Pmx B,  $n = 3$ ), and (E) IL-6 release from WT or *Tlr4* KO BMDMs ( $n = 3$ ) are shown for one representative batch of C10-15.
- F Target gene induction in *A. thaliana* seedlings. *MLO12* and *WRKY40* mRNA induction ( $n = 3$ ).

Data information: (B, C, and E) represent data (mean  $\pm$  SEM) combined from  $n$  biological replicates (mice or donors, each donor represented by one dot). In (A, D, and F), one representative of " $n$ " (given in brackets for each panel) independent experiments is shown (mean  $\pm$  SD). \* $P < 0.05$  according to one-sample *t*-test (B), Kruskal–Wallis test with Dunn's correction (C), and Student's *t*-test (D, E).

**Figure EV2. Chitin oligomers initiate cellular activation in a TLR2-dependent manner.**

- A *IL6* or *TNF* mRNA induction relative to *TBP* in human MoMacs ( $n = 3$ ).
- B Relative CD62L shedding ( $n = 8$ , histograms shown for one representative donor) and IL-8 release ( $n = 7$ – $13$ ) from human PMNs upon 1- or 4-h stimulation, respectively.
- C *TLR2* mRNA knock-down efficiency upon Ctrl, *MYD88* or *TLR2* siRNA transfection in human MoMacs (see Fig. 2c), relative to Ctrl siRNA.
- D *TLR2* immunoblot and flow cytometry in *TLR2* CRISPR-edited THP-1 cells ( $n = 1$  each). Arrowheads denote endogenous *TLR2* (glycosylated).
- E NF- $\kappa$ B activity in empty vector (EV) or NOD2, Dectin-1, or *TLR9*-transfected HEK293T cells ( $n = 2$ – $3$ ).
- F TNF release (relative to unstimulated) from WT or *Clec7a* KO (Dectin-1 deficient) immortalized macrophages (iMacs,  $n = 2$ ).

Data information: (B and C) represent data (mean  $\pm$  SEM) combined from 4 to 13 donors (each dot represents one donor). In (A, C, E, and F), one representative of “ $n$ ” (given in brackets for each panel) independent experiments is shown (mean  $\pm$  SD). \* $P < 0.05$  according to Wilcoxon signed rank sum (B), one-way ANOVA with/without Dunnett’s correction (A, C), or Student’s  $t$ -test (E, F).

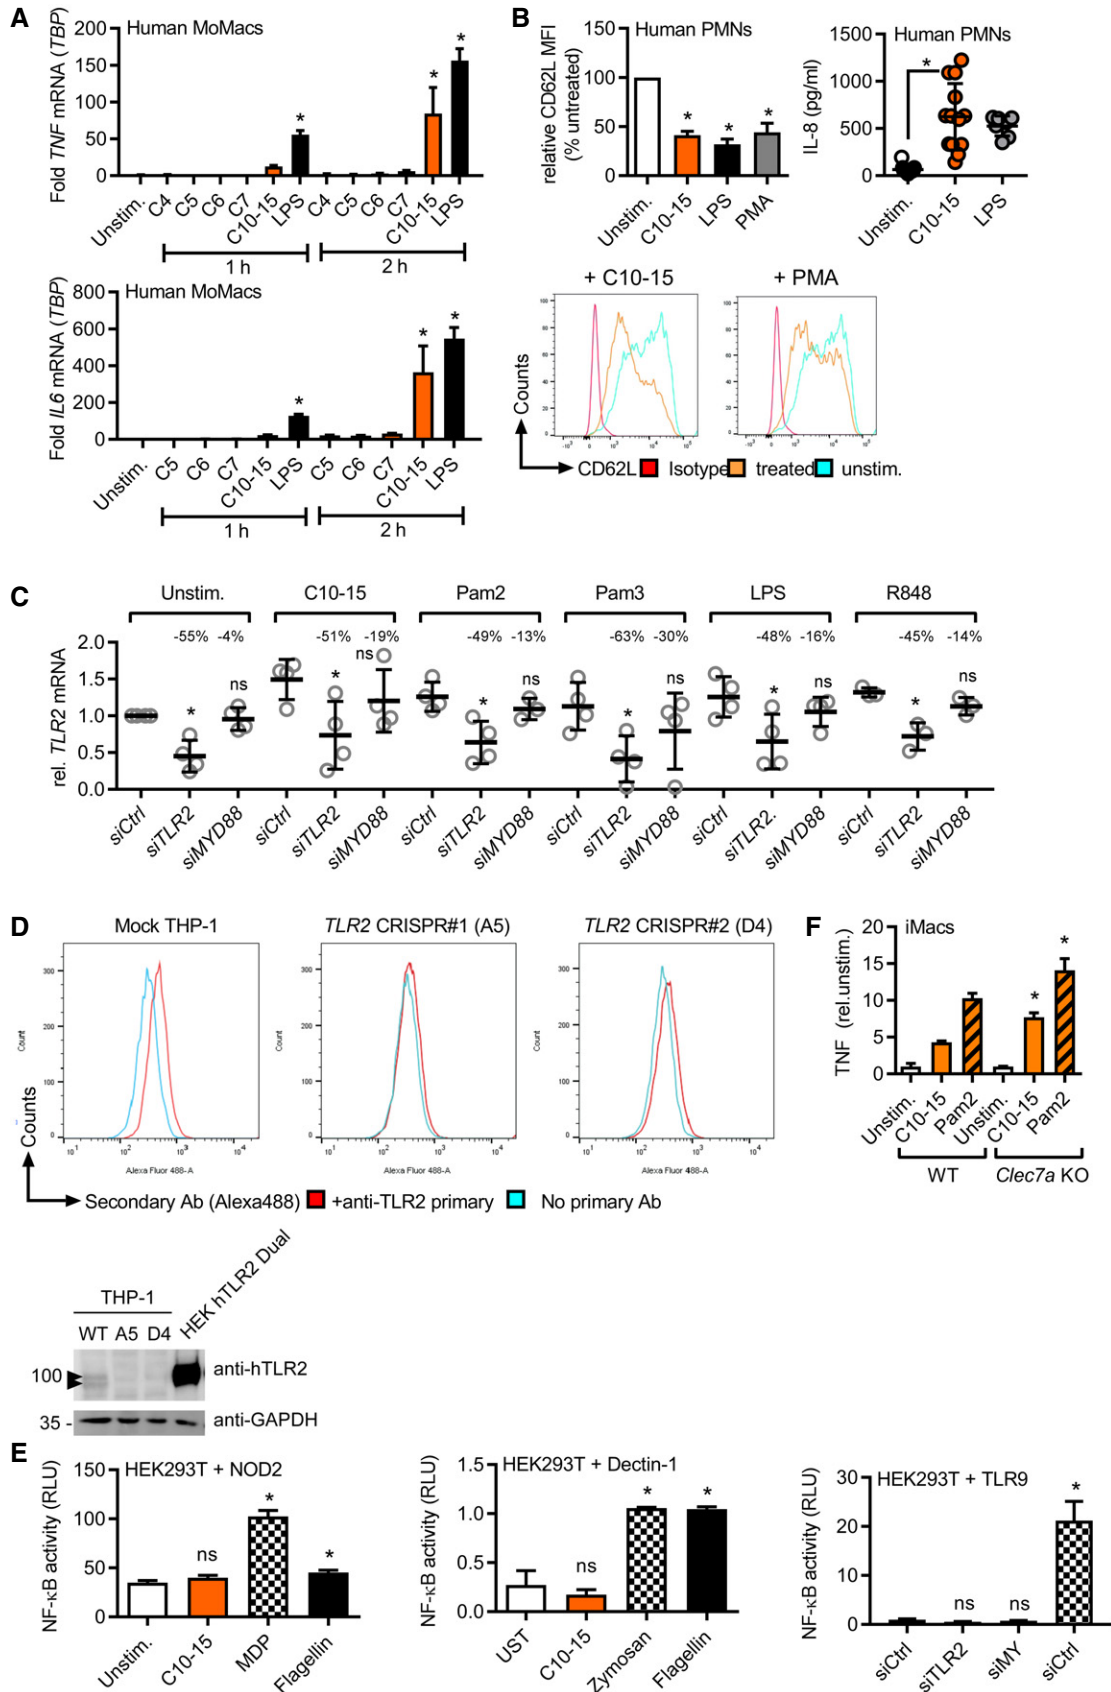

Figure EV2.

**Figure EV3. Zymosan contains chitin as a TLR2-stimulatory component and chitin oligomers induce distinct gene expression profiles.**

- A NF- $\kappa$ B activity in TLR2-HEK293T cells using zymosan with or without *o/n* incubation with *S. griseus* chitinase or chitinase alone. Note: *S. griseus* chitinase contained TLR2 activity in the absence of an additional stimulant. Incubation of zymosan with this chitinase led to a reduction in this residual level of TLR2 activity.
- B MALDI-TOF-MS analysis of chitinase-treated zymosan supernatants ( $n = 2$ ).
- C Whole-blood microarray intensities (excerpt) of the 10 genes contributing most strongly to PC1 and PC2, respectively (see Expanded View methods and Code EV1).
- D Relative cytokine mRNAs in whole-blood stimulation ( $n = 5-13$ ).

Data information: In (A and B), one representative of two independent experiments is shown (mean  $\pm$  SD). (C and D) represent data (mean  $\pm$  SEM) combined from 3 to 13 donors (each box/dot represents one donor). \* $P < 0.05$  according to one-way ANOVA with Sidak's correction (A).

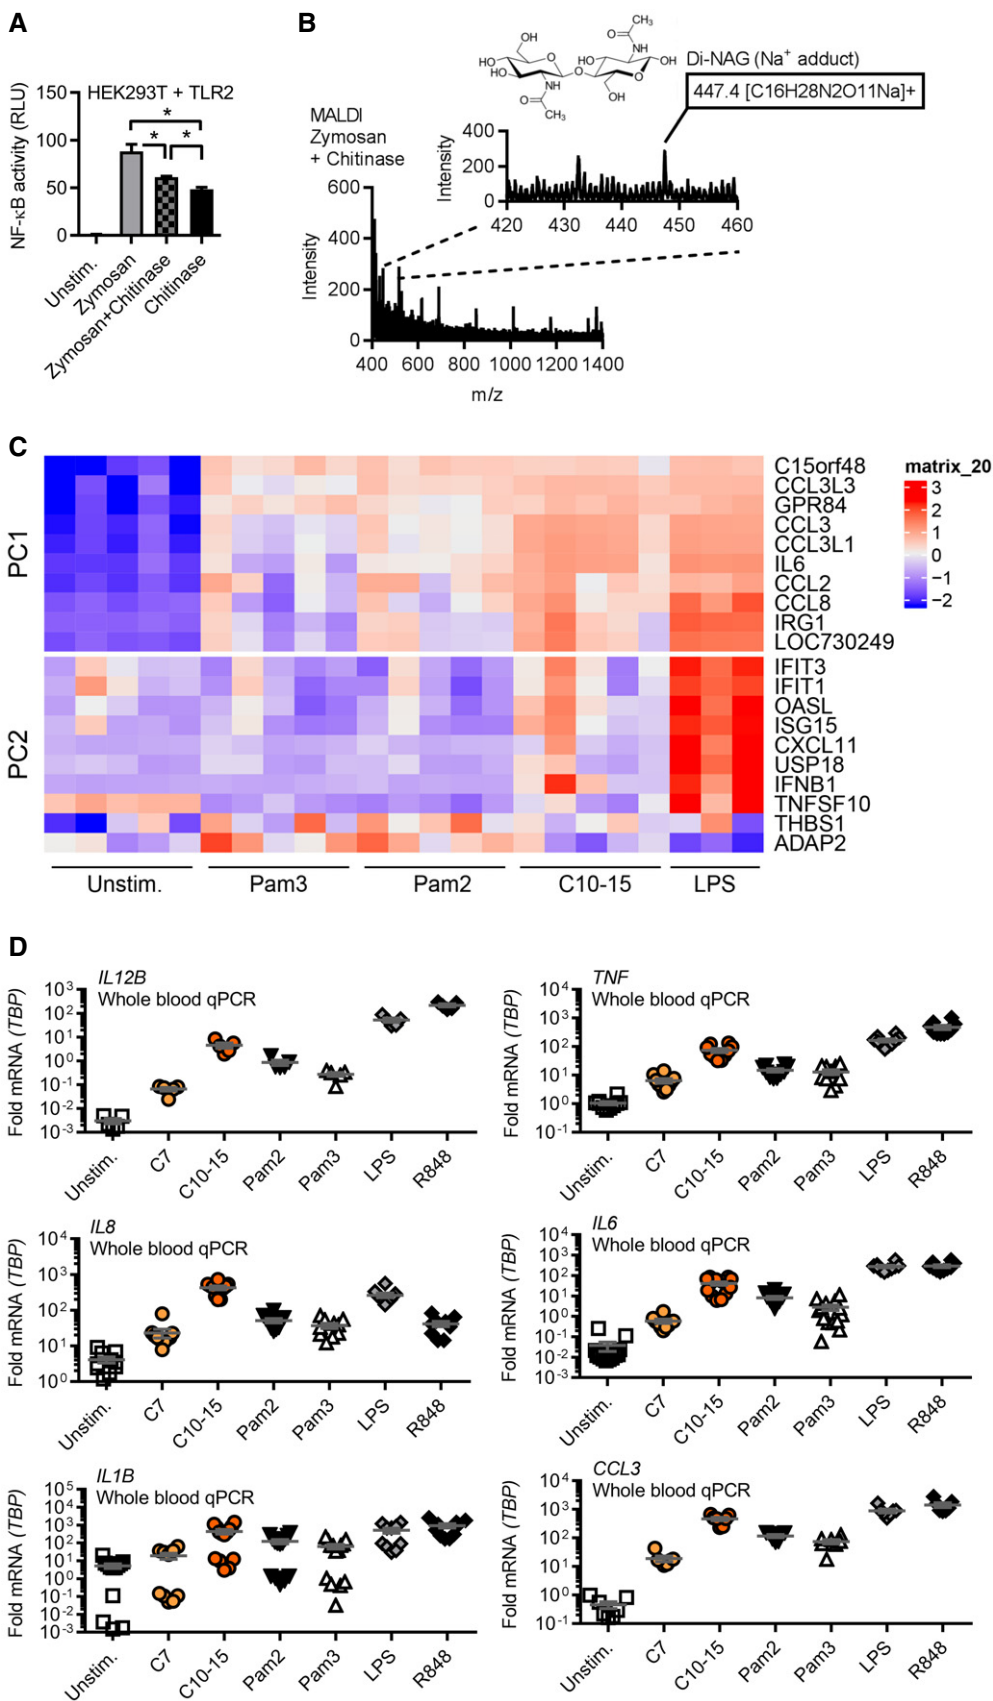

Figure EV3.

**Figure EV4. TLR2 recognition depends on residues in the hydrophobic channel of the TLR2 ectodomain.**

- A Microscale thermophoresis analysis of Alexa647-labeled C10-15 and hTLR2 protein ( $n = 3$ ).
- B–D Modeling (B), functional NF- $\kappa$ B activity (C), and expression levels (D) in empty vector (EV) or TLR2-transfected HEK293T cells ( $n = 2$ ) for TLR2 WT or point mutants designed to narrow the hydrophobic pocket. In (B), a blue dotted line delineates the hydrophobic pocket, here shown in cross-section. Black mesh signifies original surface profile in pdb 2z7x, and red mesh the predicted surface of the respective point mutant. In (C), dotted lines signify the levels of NF- $\kappa$ B activity observed for WT TLR2 for the respective ligand. (D) Expression of TLR2 mutants verified by anti-Flag immunoblot ( $n = 1$ ).
- E Docking grid used for placing of a chitin 5-mer.
- F Close-up on the gatekeeper F349 which restricts access to the cavity in “closed position” (red) but allows access in “open” rotamer position (orange).
- G Docking poses of a 5-mer (C5) in the grid specified in e and with F349 in “open” rotamer position.
- H Potential interactions of chitin 6-mer (C6) hydrophobic methyl groups with aromatic side chains in the TLR2 hydrophobic cavity.

Data information: In (A, C, and D), one representative of “ $n$ ” (given in brackets for each panel) independent experiments is shown (mean  $\pm$  SD). \* $P < 0.05$  according to two-way ANOVA with Dunnett’s correction compared to WT (top sub-panel, indicated by dotted lines in each sub-panel) in (C).

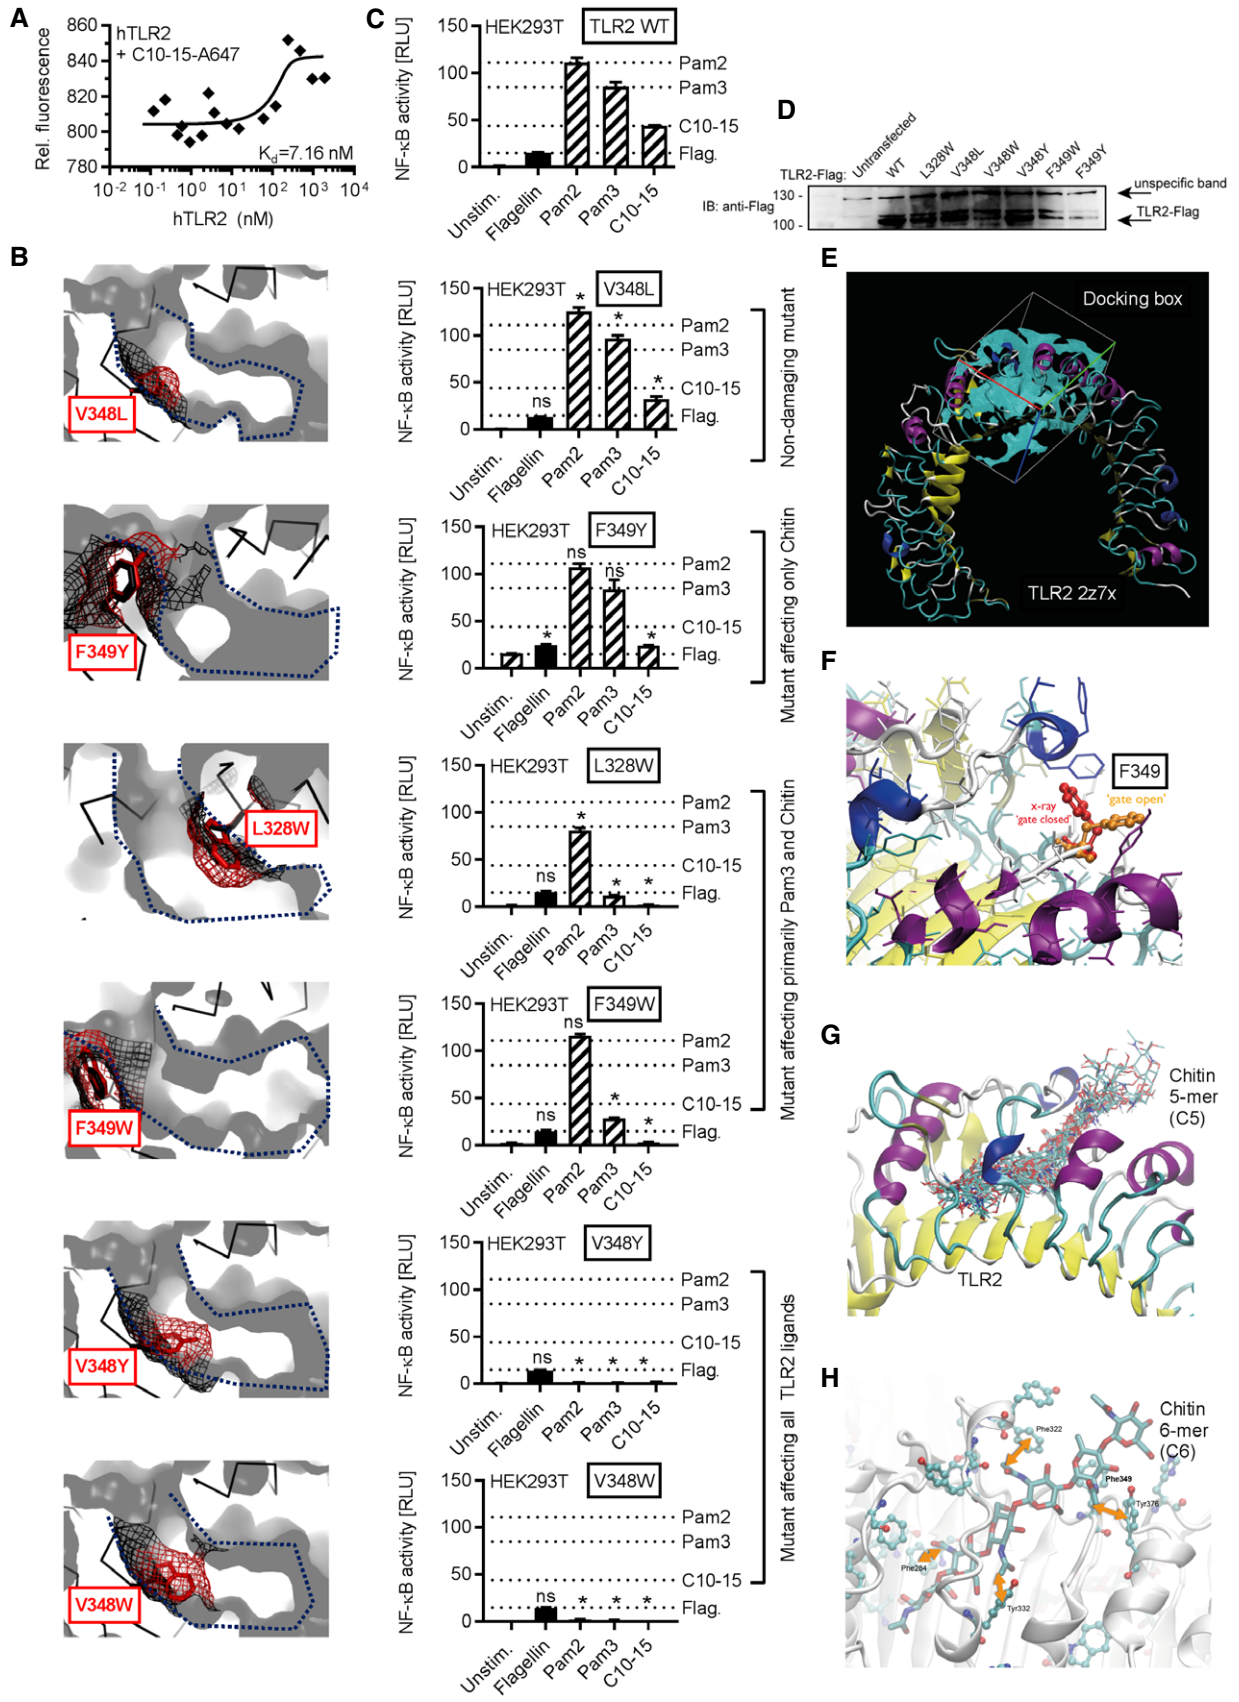

Figure EV4.



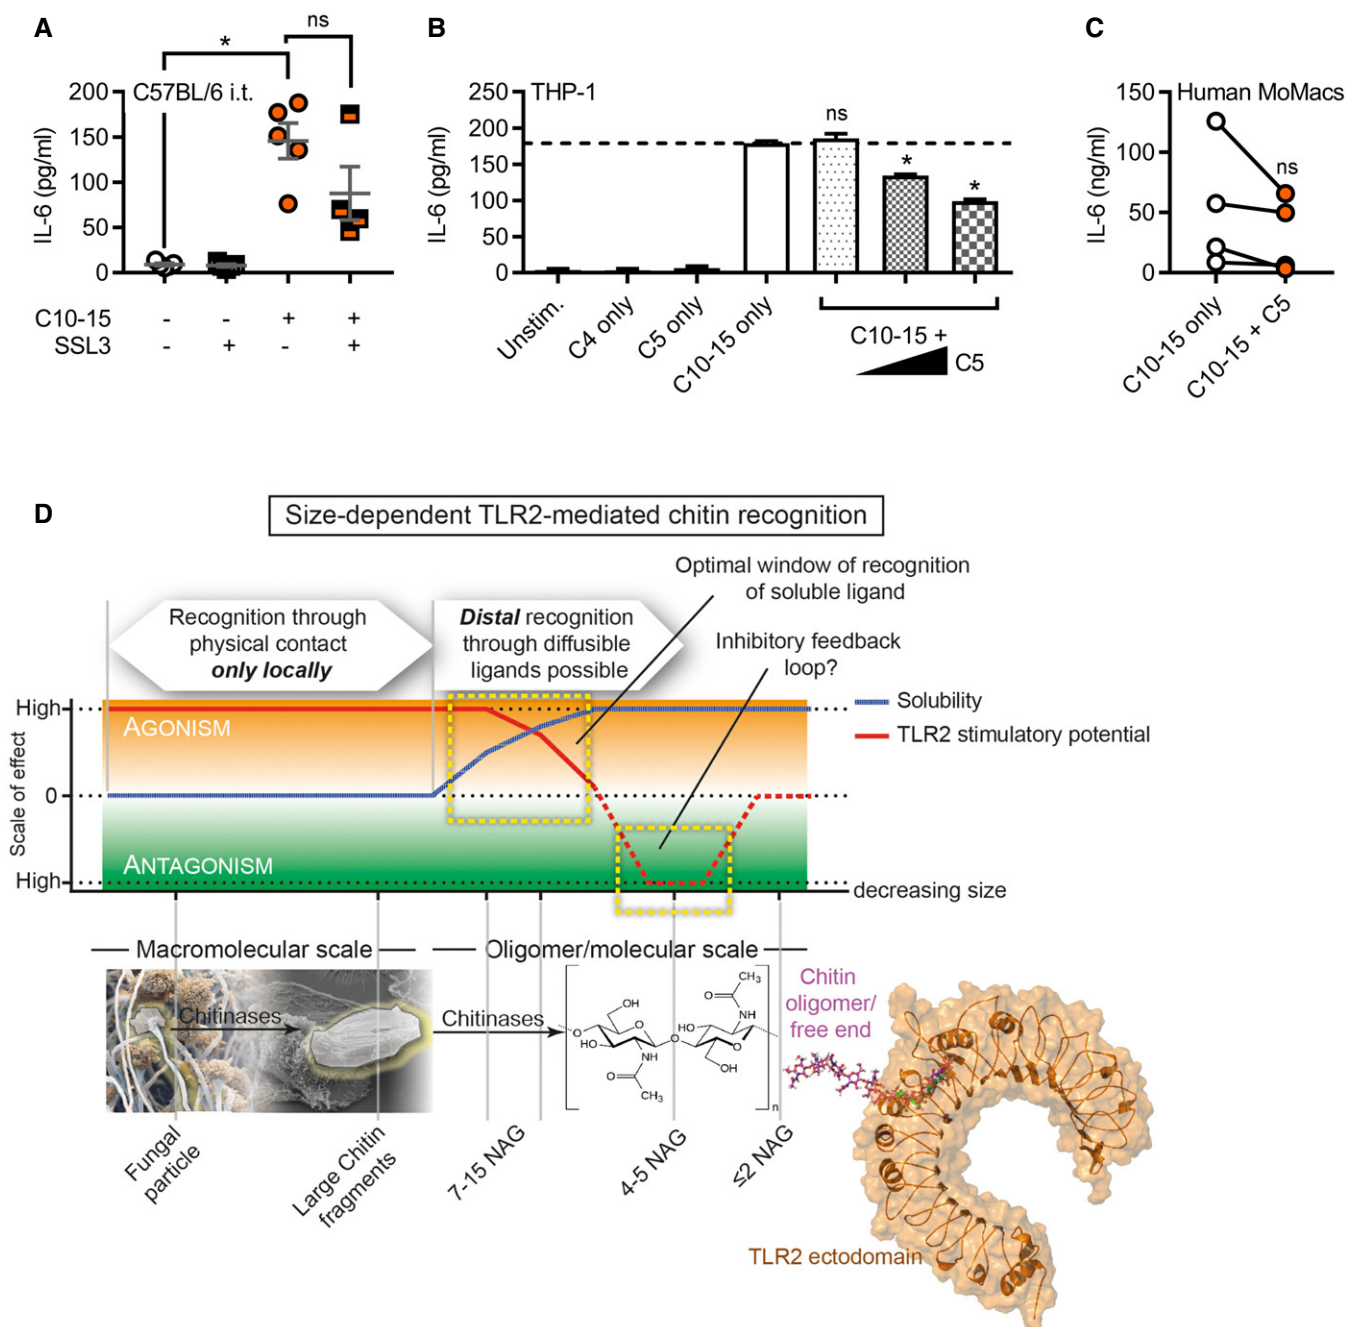

**Figure EV5. Size-dependent immuno-modulatory effects of oligomeric chitin.**

A BALF IL-6 in C57BL/6 mice ( $n = 4-5/\text{group}$ ) upon C10-15 administration without or with SSL3.

B, C IL-6 release from THP-1 cells (B) or primary MoMacs (C) without or with C5 ( $n = 3$  or 4).

D Schematic representation of size-dependent recognition of chitin oligomers by TLR2. Through the activity of chitinase or physical fragmentation, a range of different sized fragments and oligomers is generated. TLR2 recognition is possible for both particulate chitin as well as diffusible oligomers. As recognition can occur in a window where both activatory potential and solubility are high, distal recognition of fungal pathogens is possible, while the minimum length required for agonism (6 NAG) ensures that mono- or disaccharides are prevented from receptor activation. As activating oligomers are cleaved, soluble fragments with antagonistic properties may arise, representing an inherent negative regulatory loop.

Data information: (A and C) represent data (mean  $\pm$  SEM) combined from "n" biological replicates (human donors or mice, respectively; each dot represents one biological replicate). In (B), one representative of three independent experiments is shown (mean  $\pm$  SD). \* $P < 0.05$  according to one-way ANOVA with Dunnett's multiple comparison (A), Student's  $t$ -test (B), or Wilcoxon signed rank sum (C) test.
